# Supplementary material for: A novel lateral flow immunochromatographic assay using a recombinant VP2 antigen for total antibody detection of canine parvovirus-2
Source: Royal Society of Chemistry journal article supplement (doi:10.1039/d3ay01870a), 2024-01-01
Supplement: d3ay01870a1.pdf [file d3ay01870a1.pdf]

## A Novel Lateral Flow Immunochromatographic Assay Using Recombinant VP2 Antigen for Total Antibody Detection of Canine Parvovirus-2

Ezgi SALMANLI<sup>3,4</sup>, Tugba TEZCAN<sup>2</sup>, Taner KARAOGLU<sup>1</sup>

<sup>1</sup>Virology Department, Faculty of Veterinary Medicine, Ankara University, Ankara, TURKIYE.

<sup>2</sup> Department of Analytical Chemistry, Faculty of Pharmacy, Gazi University, Ankara, TURKIYE.

<sup>3</sup> METU MEMS Research and Application Center, Ankara, TURKIYE.

<sup>4</sup>Department of Virology, Graduate School of Health Sciences, Ankara University, Ankara, TURKIYE

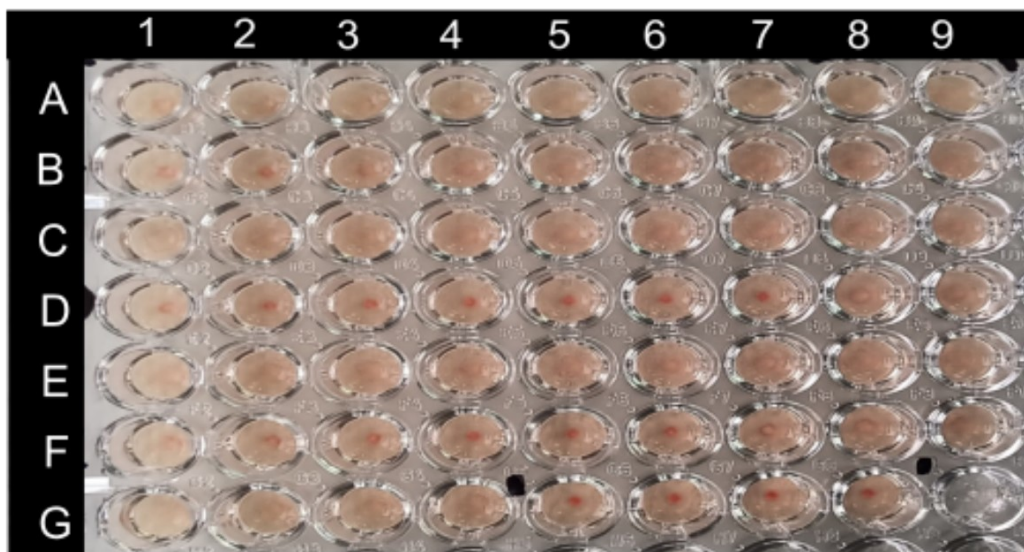

Figure S1. HAI Test for six serum samples from A to F. Serum dilution is from 1:20 to 1:5120 in lines 1-9. G1-G4 and G5-G8 represent Virus Control wells and RBC (Red Blood Cells) control wells respectively.

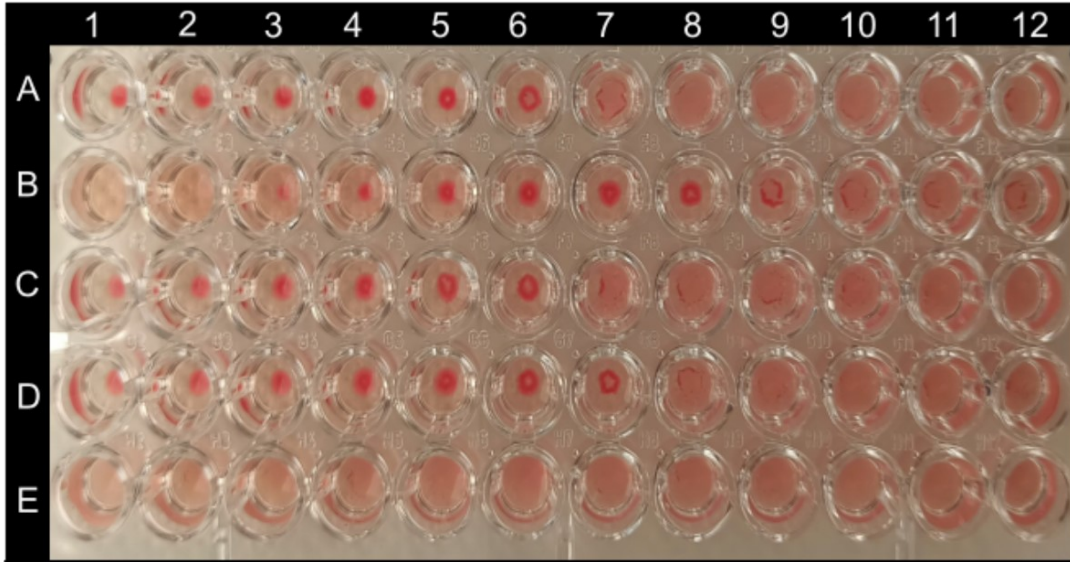

Figure S2. HAI test for four serum samples from A to D. Serum dilution is from 1:32 to 1:65536 in lines 1-12. "E" row represents Virus Control wells.

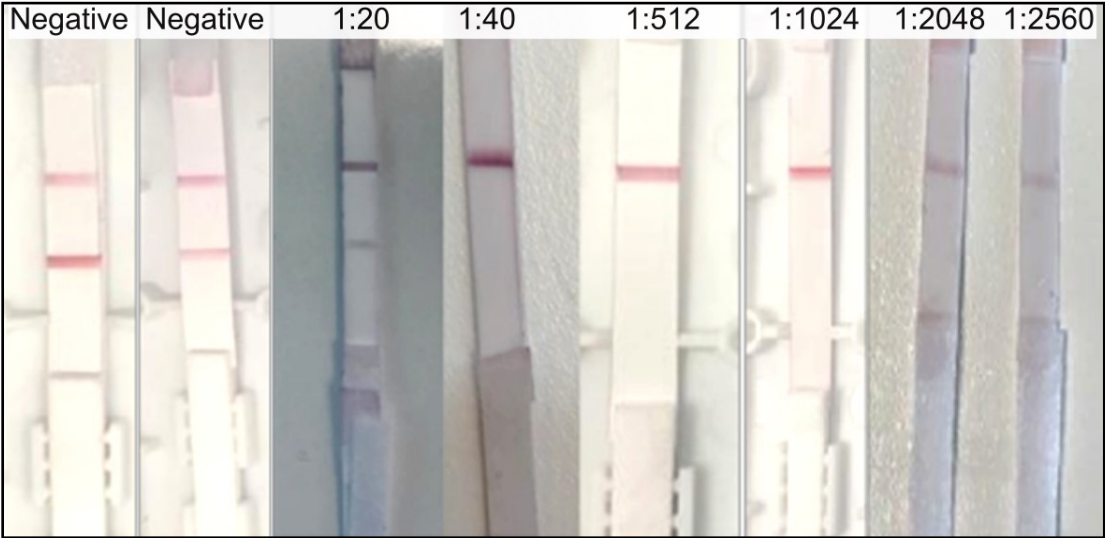

Figure S3. cLFA test results of clinical serum samples.

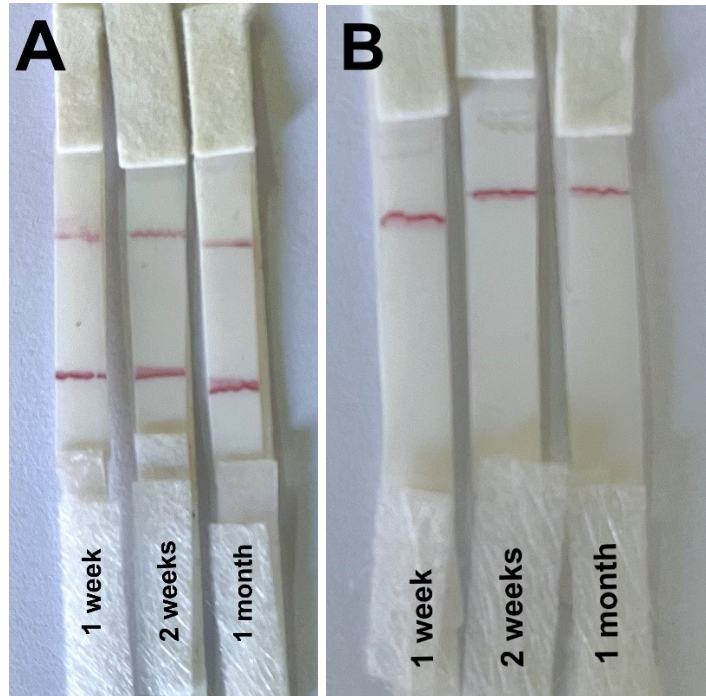

Figure S4. The stability test results for A. negative samples (no antibody), B. positive samples (1000 ng/mL of std. antibody) in the different time interval.
